# Supplementary material for: Synchronously boosting microwave-absorbing and heat-conducting capabilities in CeO2/Ce(OH)3 core–shell nanorods/nanofibers via Fe-doping amount control
Source: Royal Society of Chemistry journal article supplement (doi:10.1039/d3mh00061c), 2023-01-01
Supplement: d3mh00061c1.pdf [file d3mh00061c1.pdf]

## Supporting Information

### Synchronously boosting microwave-absorbing and heat-conducting capabilities in $\text{CeO}_2/\text{Ce}(\text{OH})_3$ core-shell nanorods/nanofibers via Fe-doping amount control

Xinxin Wang,<sup>†</sup> Feifei You,<sup>†</sup> Qibin Yao,<sup>†</sup> Kairui Wang,<sup>†</sup> You Liao,<sup>†</sup> Guoxiu Tong,<sup>\* †</sup> Xiaojuan Wang,<sup>†</sup> Tong Wu,<sup>\* ‡</sup> and Wenhua Wu<sup>†</sup>

<sup>†</sup>*College of Chemistry and Life Sciences, Key Laboratory of the Ministry of Education for Advanced Catalysis Materials, Zhejiang Normal University, Jinhua 321004, China.*

<sup>‡</sup>*Department of Chemistry, Carnegie Mellon University, Pittsburgh, PA, US*

**\* Corresponding Authors:** E-mail: [tonggx@zjnu.cn](mailto:tonggx@zjnu.cn) (G.X. Tong); [tongwu@andrew.cmu.edu](mailto:tongwu@andrew.cmu.edu) (T. Wu). Tel.: +86-579-82282269; Fax: +86-579-82282269.

### Characterization

The morphology, size, elemental content, and mapping of Fe-doped  $\text{CeO}_2/\text{Ce}(\text{OH})_3$  CSNRs/NFs were examined on a scanning electron microscope (SEM, ZEISS, GeminiSEM 300, 10 kV) linked to an energy-dispersive X-ray spectrometer (EDS, Horiba EX-250, 15 kV). The core-shell structure and crystallinity were analyzed by a transmission electron microscope (TEM, JEM-2100F, 200 kV). XRD patterns were captured using a D/MAX-III A X-ray diffractometer (XRD) for the phase analysis. Cu  $K\alpha$  with  $\lambda = 0.15418$  nm acts as the radiation source with a working voltage of 40.0 kV, a working current of 40.0 mA, and a scanning speed of  $10^\circ/\text{min}$ . A Fourier transform infrared spectrometer (FTIR, Nicolet 8700) was utilized to capture FTIR spectra to analyze the chemical structure of Fe-doped  $\text{CeO}_2/\text{Ce}(\text{OH})_3$  CSNRs/NFs. A Raman spectrometer (Renishaw, RM10000) was employed to obtain Raman spectra for the study of oxygen vacancy defects. The analysis of chemical states and oxygen vacancy defects was done on an ESCALAB250 X-ray photoelectron spectroscope (XPS). A WIC640 infrared thermal imager was used to capture infrared photos to investigate the process of heat transfer.

## Measurements of magnetic properties, conductivity, and EM parameters

Measurements of static magnetic properties were performed using a vibrating specimen magnetometer (Model 7404, LakeShore, USA) at room temperature. The conductivity measurement was done by an RTS-9 model four-point probe. The measured disc pellets (diameter: 13.0 mm; thickness: 1.0 mm) were prepared by filling the powder specimens into a mold and then pressing them into disc pellets. The as-obtained powder specimens were mixed uniformly with molten paraffin at 45% loading and shaped into toroidal specimens ( $H$ =ca. 3.5 mm,  $\phi_{\text{out}}$ =7.0 mm, and  $\phi_{\text{in}}$ =3.04 mm) in a mold to determine the EMWACs. Permeability ( $\mu_r = \mu' - j\mu''$ ) and permittivity ( $\epsilon_r = \epsilon' - j\epsilon''$ ) were measured by a Keysight N5230A vector network analyzer using the coaxial line method.

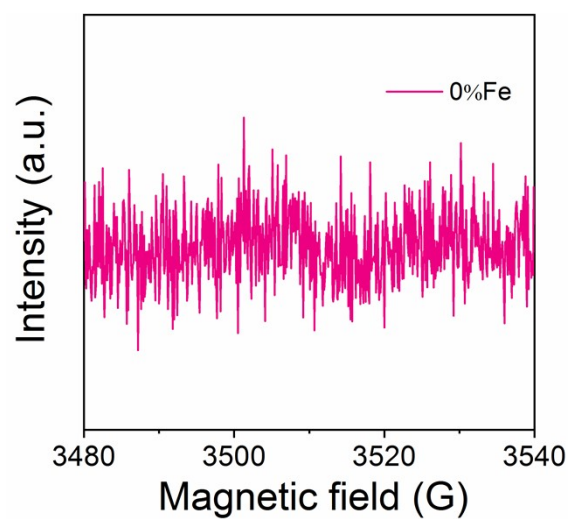

**Fig. S1** EPR spectra of Ce(OH)<sub>3</sub>/CeO<sub>2</sub> CSNFs/CSNRs.

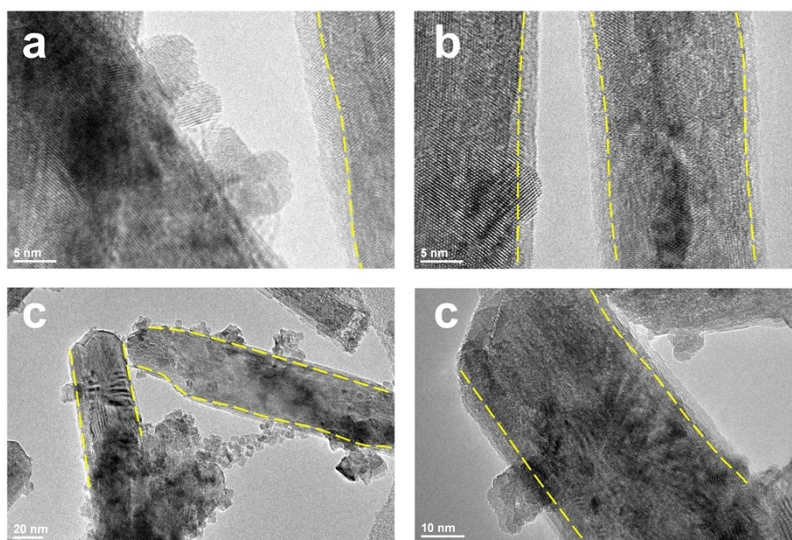

**Fig. S2** TEM images of the specimens produced at (a–b) 20% Fe doping amount and (c–d) 50% Fe doping amount.

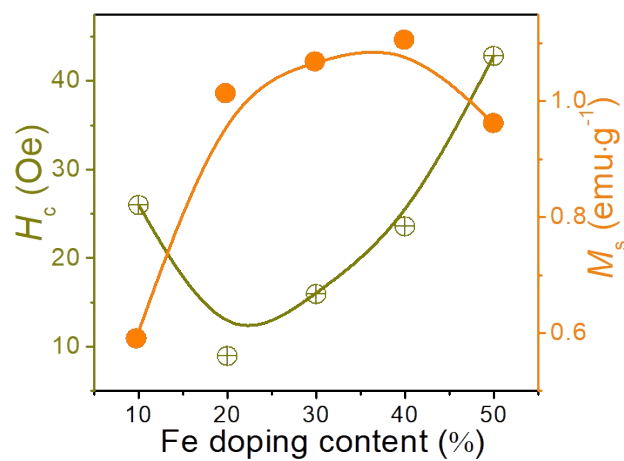

**Fig. S3**  $M_s$  and  $H_c$  as a function of Fe-doping amount

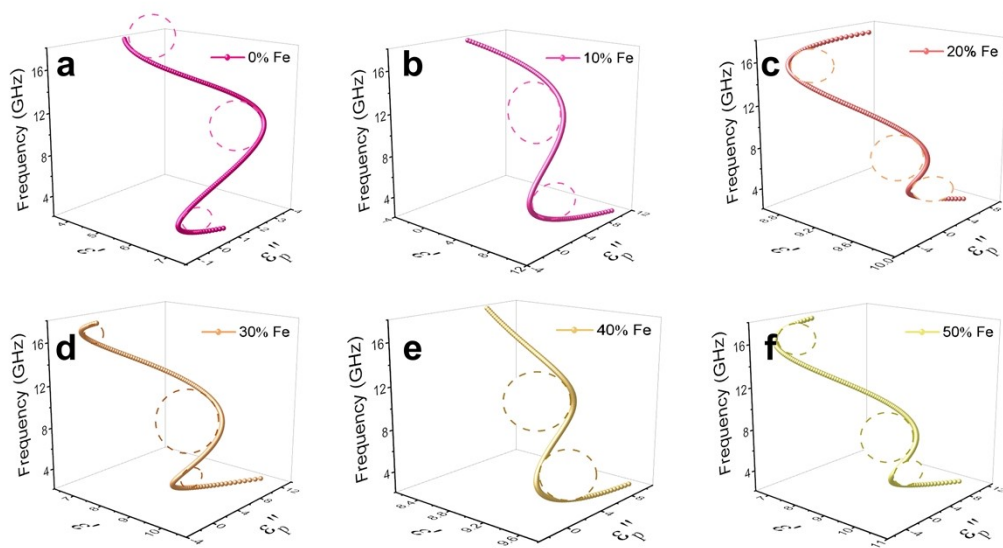

**Fig. S4** Cole–Cole curves of Fe- doped  $\text{Ce}(\text{OH})_3/\text{CeO}_2$  CSNR/Fs.

**Table S1** Comprehensive comparison of the EMWAPs with reported absorbers.<sup>[14–28, 43–45]</sup>

| Absorbers                                                                   | Filling mass fraction (%) | Optimal $R_L$ value (dB) | $f$ (GHz) (optimal $R_L$ ) | $d$ (mm) ( $R_L < -10$ dB) | Bandwidth (GHz) ( $R_L < -10$ dB) | EABW/ $d$ (GHz/mm) | Ref.      |
|-----------------------------------------------------------------------------|---------------------------|--------------------------|----------------------------|----------------------------|-----------------------------------|--------------------|-----------|
| Ba <sub>0.8</sub> Ce <sub>0.2</sub> Fe <sub>12</sub> O <sub>19</sub>        | 70                        | −20.4                    | 16.10                      | 6.50                       | 1.00                              | 0.15               | 20        |
| Nanostructured 3D CeO <sub>2</sub>                                          | >50                       | −19.3                    | 15.80                      | 2.00                       | <0.50                             | 0.25               | 16        |
| Zn modified CeO <sub>2</sub> microspheres                                   | 70                        | −35                      | 14.00                      | 2.00                       | Approx.0.5                        | 0.25               | 18        |
| BaCe <sub>0.05</sub> Fe <sub>11.95</sub> O <sub>19</sub> ferrite            | 70                        | −37.4                    | 12.80                      | 6.50                       | 3.00                              | 0.46               | 21        |
| CeO <sub>2</sub> /MWCNT Co-doped                                            | 70                        | −34.64                   | 16.25                      | 5.00                       | 2.88                              | 0.58               | 23        |
| CeO <sub>2</sub> /rGO nanocomposites                                        | 60                        | −53.66                   | 6.40                       | 3.50                       | 4.00                              | 1.14               | 19        |
| PANI/CeO <sub>2</sub>                                                       | 50                        | −40                      | 8.80                       | 3.00                       | 4.00                              | 1.33               | 25        |
| CNT/CeO <sub>2-x</sub>                                                      | 50                        | −52.4                    | 6.15                       | 4.00                       | 5.50                              | 1.38               | 24        |
| yolk@shell hybrids MoS <sub>2</sub> /CeO <sub>2</sub> composites            | 50                        | −56.3                    | 10.70                      | 3.00                       | <5.00                             | 1.67               | 26        |
| BaCe <sub>0.2</sub> Fe <sub>11.8</sub> O <sub>19</sub> /C NTs nanocomposite | 40                        | −49.61                   | 9.00                       | 2.50                       | 4.20                              | 1.68               | 22        |
| CeOHCO <sub>3</sub> (20% Fe)                                                | 50                        | −37.08                   | 7.44 (4.9 mm)              | 3.40                       | 7.04                              | 1.90               | 17        |
| CeO <sub>2</sub> (300 °C)                                                   | 45                        | −34.49                   | 13.28                      | 2.00                       | 4.00                              | 2.00               | 14        |
| CeO <sub>2</sub> -rGO                                                       | 50                        | −45.9                    | 13.28                      | 2.00                       | 4.50                              | 2.00               | 43        |
| CeOHCO <sub>3</sub> (S4)                                                    | 60                        | −42.71                   | 9.12                       | 2.90                       | 6.40                              | 2.21               | 44        |
| yolk-shell CeO <sub>2</sub> microspheres                                    | 33.3                      | −71.3                    | 14.50                      | 2.00                       | 5.40                              | 2.70               | 15        |
| Co <sub>3</sub> O <sub>4</sub> /CeO <sub>2</sub> /CNTs composites           | 33.3                      | −59.82                   | 11.92                      | 1.73                       | 5.20                              | 3.01               | 27        |
| core-shell CeO <sub>2</sub> @Fe                                             | 80                        | −23.88                   | 9.60                       | 1.10                       | 4.24                              | 3.85               | 28        |
| CeO <sub>2</sub> /Ce(OH) <sub>3</sub> CSNFs                                 | 45                        | −50.28                   | 9.76                       | 2.40                       | 5.12                              | 2.13               | This work |
| 10%Fe-doped CeO <sub>2</sub> /Ce(OH) <sub>3</sub> CSNFs                     | 45                        | −42.33                   | 3.76                       | 1.70                       | 9.26                              | 5.45               |           |
| 20%Fe-doped CeO <sub>2</sub> /Ce(OH) <sub>3</sub> CSNFs                     | 45                        | −45.42                   | 4.00                       | 1.70                       | 6.64                              | 3.91               |           |
| 30%Fe-doped CeO <sub>2</sub> /Ce(OH) <sub>3</sub> CSNFs                     | 45                        | −54.64                   | 3.60                       | 1.50                       | 6.64                              | 4.43               |           |
| 40%Fe-doped CeO <sub>2</sub> /Ce(OH) <sub>3</sub> CSNRs                     | 45                        | −43.92                   | 3.76                       | 1.60                       | 7.12                              | 4.45               |           |
| 50%Fe-doped CeO <sub>2</sub> /Ce(OH) <sub>3</sub> CSNRs                     | 45                        | −39.27                   | 13.04                      | 1.80                       | 8.24                              | 4.58               |           |

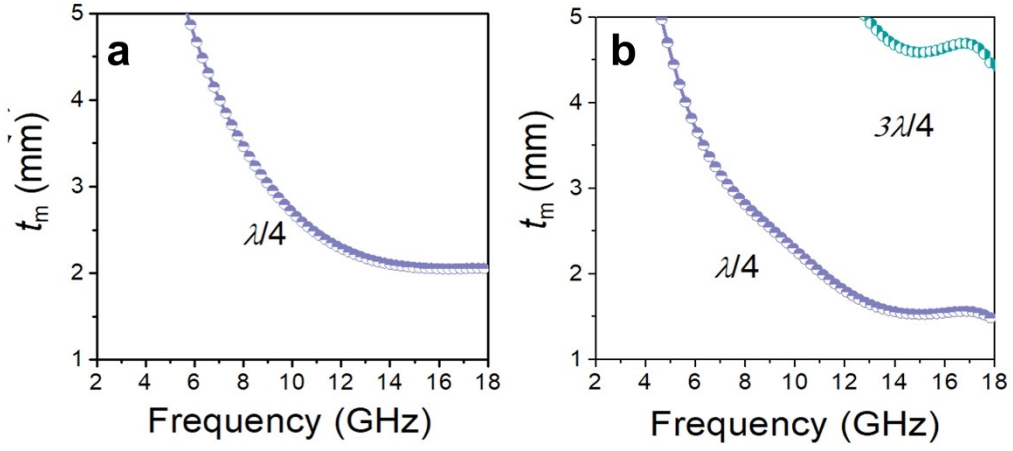

**Fig. S5** Matching thickness as a function of frequency for a)  $\text{Ce}(\text{OH})_3/\text{CeO}_2$  CSNFs/CSNRs and b) 10%Fe-doped  $\text{Ce}(\text{OH})_3/\text{CeO}_2$  CSNFs/CSNRs.

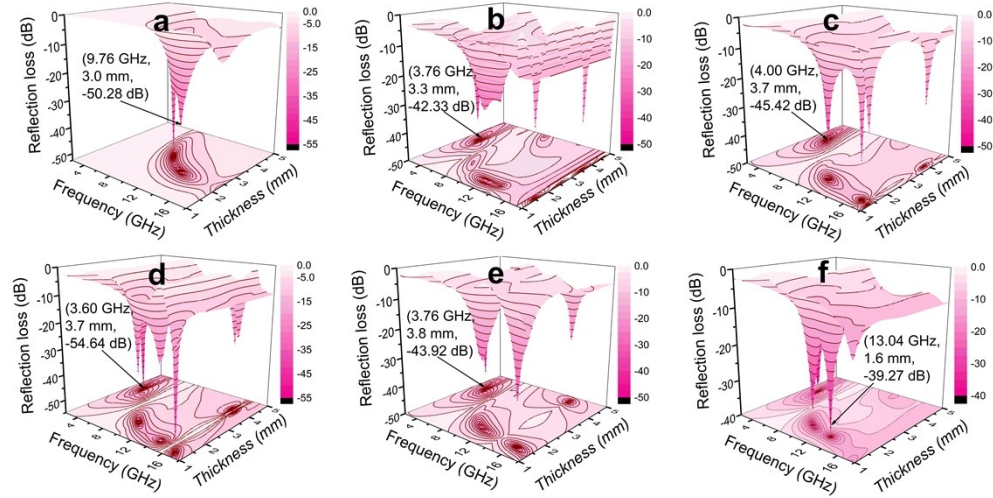

**Fig. S6** Frequency characteristics: a)–f) 3D RL plots of the paraffin composites containing 45 wt.% specimens produced under various Fe doping amounts: (a) 0%, (b) 10%, (c) 20%, (d) 30%, (e) 40%, and (f) 50%.

**Table S2** Heat conductance summarization of Fe- doped Ce(OH)<sub>3</sub>/CeO<sub>2</sub> CSNR/Fs and other Ce-based fillers.<sup>[50–63,29,2,45,30,31]</sup>

| Filler                                                                             | Loading (%) | Heat conductance (W/m·k) | Ref.      |
|------------------------------------------------------------------------------------|-------------|--------------------------|-----------|
| SiC-SiO <sub>2</sub> -Al <sub>2</sub> O <sub>3</sub> -TiO <sub>2</sub>             | 80          | 0.122                    | 50        |
| Y <sub>2.8</sub> Ce <sub>0.2</sub> Al <sub>15</sub> O <sub>12</sub>                | 15          | 0.3796                   | 51        |
| La <sub>2</sub> (Zr <sub>0.7</sub> Ce <sub>0.3</sub> ) <sub>2</sub> O <sub>7</sub> | /           | 0.541                    | 52        |
| Al <sub>2</sub> O <sub>3</sub> @AgNPs                                              | 70          | 0.67                     | 53        |
| Thiolene/TiO <sub>2</sub>                                                          | 90          | 0.76                     | 54        |
| Ti <sub>3</sub> C <sub>2</sub> T <sub>x</sub>                                      | 50          | 0.767                    | 55        |
| Pt@TiO <sub>2</sub>                                                                | 100         | 0.998                    | 56        |
| CoSb <sub>3</sub> +1% CeO <sub>2</sub>                                             | /           | 1.00                     | 29        |
| Al <sub>2</sub> O <sub>3</sub> /TiO <sub>2</sub>                                   | 100         | 1.25                     | 57        |
| Si <sub>3</sub> N <sub>4</sub> /PTFE                                               | 70          | 1.3                      | 58        |
| PI/Al <sub>2</sub> O <sub>3</sub> composite film                                   | 80          | 1.3                      | 59        |
| CoSb <sub>3</sub> +5% CeO <sub>2</sub>                                             | /           | 1.7                      | 29        |
| BN/MWCNT/PPS                                                                       | 51          | 1.74                     | 60        |
| g-C <sub>3</sub> N <sub>4</sub> @Fe@C hollow micro-polyhedra                       | 20          | 1.75                     | 2         |
| BN-GO                                                                              | 50          | 2.11                     | 61        |
| TiO <sub>2</sub> /Fe/C nanocomposites                                              | 45          | 2.188                    | 45        |
| CeO <sub>2</sub> +18 vol.% SiC                                                     | /           | ~2.2                     | 30        |
| CeO <sub>2</sub> -Gd <sub>2</sub> O <sub>3</sub>                                   | /           | ~2.2                     | 31        |
| Ti <sub>3</sub> C <sub>2</sub> T <sub>x</sub> MXene microflakes                    | 50          | 2.746                    | 62        |
| GO/AlN                                                                             | 56          | 2.770                    | 63        |
| CeO <sub>2</sub> /Ce(OH) <sub>3</sub> CSNFs                                        | 45          | 1.864                    |           |
| 10%Fe-doped CeO <sub>2</sub> /Ce(OH) <sub>3</sub> CSNFs                            | 45          | 2.518                    |           |
| 20%Fe-doped CeO <sub>2</sub> /Ce(OH) <sub>3</sub> CSNFs                            | 45          | 3.442                    |           |
| 30%Fe-doped CeO <sub>2</sub> /Ce(OH) <sub>3</sub> CSNFs                            | 45          | 2.240                    | This work |
| 40%Fe-doped CeO <sub>2</sub> /Ce(OH) <sub>3</sub> CSNRs                            | 45          | 2.237                    |           |
| 50%Fe-doped CeO <sub>2</sub> /Ce(OH) <sub>3</sub> CSNRs                            | 45          | 2.143                    |           |
